# Supplementary material for: On Trend Breaks and Initial Condition in Unit Root Testing
Source: publisher site journal article supplement (doi:10.1515/jtse-2016-0014), 2017-07-18
Supplement: Supplementary file 1 [file Supplement.pdf › Supplement.pdf]

# Appendix to “On Trend Breaks and Initial Condition in Unit Root Testing”

Anton Skrobotov\*

The Russian Presidential Academy  
of National Economy and Public Administration

June 6, 2017

## 1 Asymptotic local power for OLS-based tests

In this section we provide additional simulation results for asymptotic local power functions of OLS-based tests by using the same notation as in the main text (see Figures 5 and 6 in the main text). Additional notation is used for break date estimators for  $ADF-OLS(\lambda)$ , where  $\lambda$  is a generic break fraction:  $\hat{\lambda}^{D_m}$  is the break fraction estimator proposed by Harvey and Leybourne (2013) and  $\tilde{\lambda}$  is the break fraction estimator based on first difference regression proposed by Harris *et al.* (2009).

---

\*E-mail: antonskrobotov@gmail.com

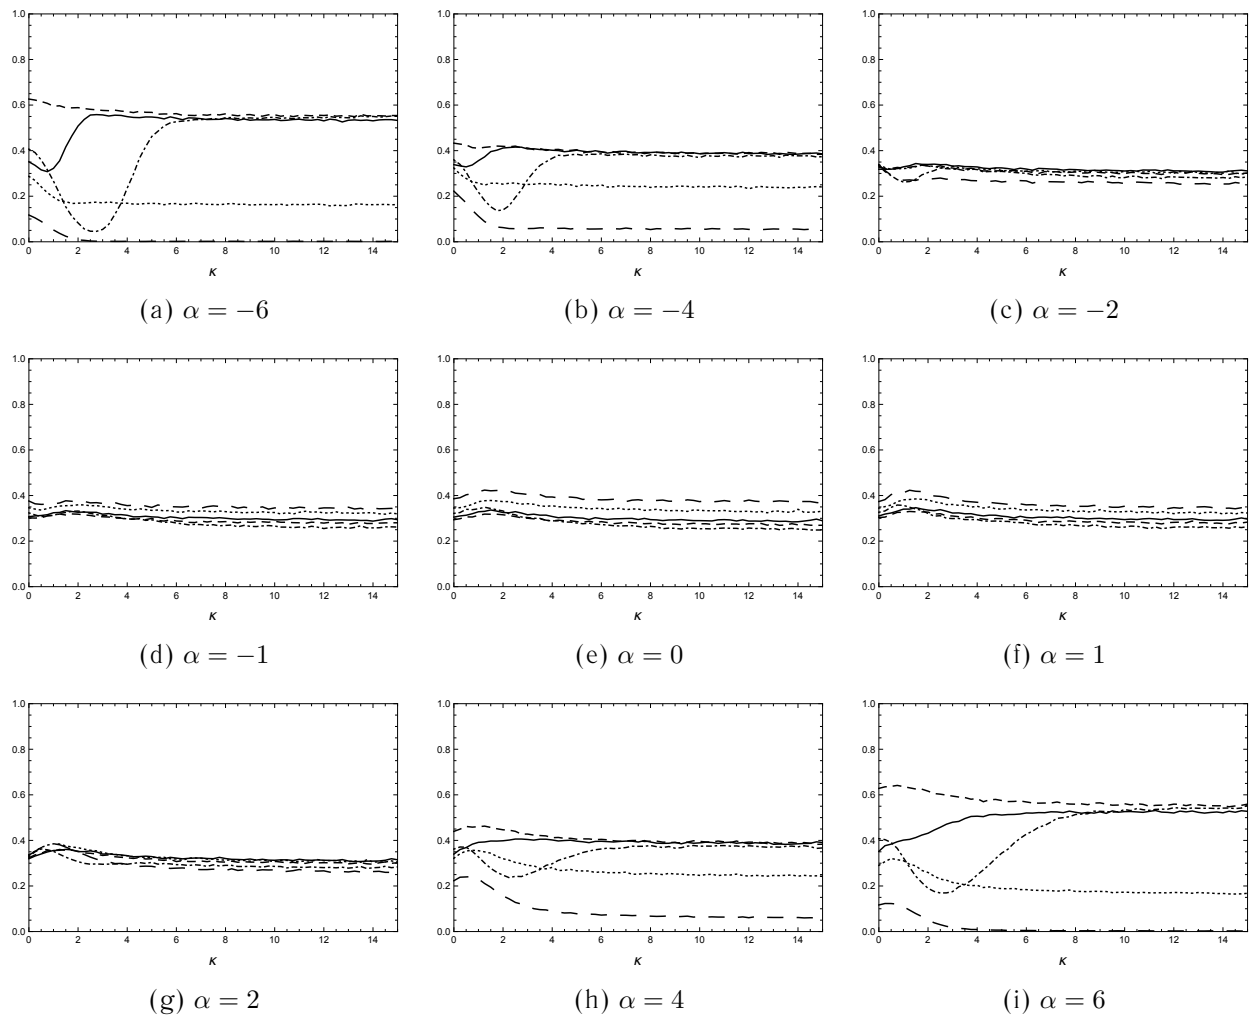

Figure 1. Асимптотическая локальная мощность,  $c = 20$   
 $ADF-OLS(\hat{\lambda}^{D_m}) : \text{—}$ ,  $ADF-OLS^{\max} : \text{---}$ ,  $MDF-OLS : \text{- -}$ ,  $MDF-OLS_{\rho} : \cdots$ ,  
 $ADF-OLS(\tilde{\lambda}) : \text{-} \cdot \text{-}$

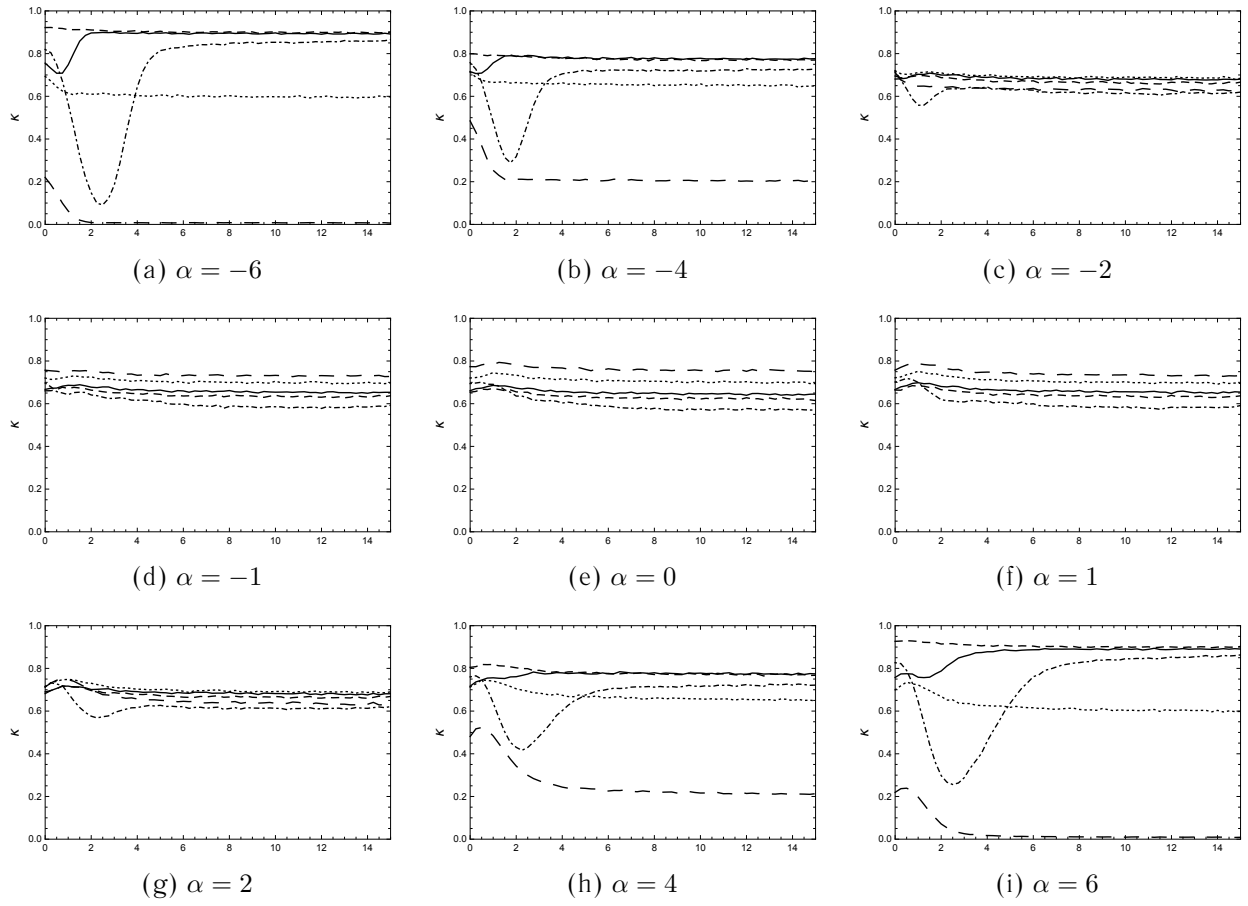

Figure 2. Асимптотическая локальная мощность,  $c = 30$   
 $ADF-OLS(\hat{\lambda}^{D_m}) : \text{—}$ ,  $ADF-OLS^{\max} : \text{--}$ ,  $MDF-OLS : \dots$ ,  $MDF-OLS_{\rho} : \cdot \cdot \cdot$ ,  
 $ADF-OLS(\tilde{\lambda}) : - \cdot -$

## 2 Finite sample size (for Zivot-Andrews *MDF-OLS* test) and finite sample power (for robust test for a break)

In this section we provide finite sample size of Zivot-Andrews *MDF-OLS* test for various  $\kappa$ . We also provide the finite sample size and power of robust tests for break,  $t_{HLT}$  and  $t_{PY}$ , proposed by Perron and Yabu (2009) and Harvey *et al.* (2009), respectively. The DGP is

$$y_t = \mu + \beta t + \gamma_T DT_t(\lambda_0) + u_t, \quad t = 1, \dots, T, \quad (1)$$

$$u_t = \rho_T u_{t-1} + \varepsilon_t, \quad t = 2, \dots, T, \quad (2)$$

where  $\gamma_T = \kappa T^{-1/2}$  and the error term  $\varepsilon_t$  is generated according to either an *i.i.d* sequence or the AR(1) and MA(1) processes according to  $\varepsilon_t \sim i.i.d.N(0, 1)$  for the case of *i.i.d.*,  $\varepsilon_t = \phi \varepsilon_{t-1} + e_t$  for the case of AR(1), and  $\varepsilon_t = e_t - \phi e_{t-1}$  for the case of MA(1), where  $e_t \sim i.i.d.N(0, 1)$ . The sample size  $T \in \{100, 200\}$ , the break magnitude  $\kappa \in \{0, 2, \dots, 40\}$ , the parameter  $\phi \in \{-0.8, -0.5, -0.2, 0, 0.2, 0.5, 0.8\}$ , the number of replications is 10,000.

Table 1. Finite sample size (for Zivot-Andrews test) and finite sample power (for robust test for a break), AR(1) case,  $T = 100$ ,  $\lambda = 0.15$

| $\kappa$ | $\phi = -0.8$ |                        |                       | $\phi = -0.5$ |                        |                       | $\phi = -0.2$ |                        |                       | $\phi = 0$  |                        |                       | $\phi = 0.2$ |                        |                       | $\phi = 0.5$ |                        |                       | $\phi = 0.8$ |                        |                       |
|----------|---------------|------------------------|-----------------------|---------------|------------------------|-----------------------|---------------|------------------------|-----------------------|-------------|------------------------|-----------------------|--------------|------------------------|-----------------------|--------------|------------------------|-----------------------|--------------|------------------------|-----------------------|
|          | <i>ZA</i>     | <i>t<sub>HLT</sub></i> | <i>t<sub>PY</sub></i> | <i>ZA</i>     | <i>t<sub>HLT</sub></i> | <i>t<sub>PY</sub></i> | <i>ZA</i>     | <i>t<sub>HLT</sub></i> | <i>t<sub>PY</sub></i> | <i>ZA</i>   | <i>t<sub>HLT</sub></i> | <i>t<sub>PY</sub></i> | <i>ZA</i>    | <i>t<sub>HLT</sub></i> | <i>t<sub>PY</sub></i> | <i>ZA</i>    | <i>t<sub>HLT</sub></i> | <i>t<sub>PY</sub></i> | <i>ZA</i>    | <i>t<sub>HLT</sub></i> | <i>t<sub>PY</sub></i> |
| 0        | 0.04          | 0.11                   | 0.14                  | 0.04          | 0.12                   | 0.15                  | 0.07          | 0.15                   | 0.11                  | 0.05        | 0.17                   | 0.08                  | 0.02         | 0.18                   | 0.13                  | 0.04         | 0.24                   | 0.13                  | 0.06         | 0.44                   | 0.19                  |
| 2        | 0.04          | 0.14                   | 0.24                  | 0.04          | 0.18                   | 0.20                  | 0.07          | 0.19                   | 0.13                  | 0.05        | 0.20                   | 0.11                  | 0.02         | 0.20                   | 0.15                  | 0.04         | 0.24                   | 0.13                  | 0.07         | 0.44                   | 0.19                  |
| 4        | 0.04          | 0.28                   | 0.54                  | 0.04          | 0.36                   | 0.39                  | 0.06          | 0.33                   | 0.20                  | 0.05        | 0.29                   | 0.18                  | 0.02         | 0.28                   | 0.21                  | 0.03         | 0.27                   | 0.15                  | 0.07         | 0.45                   | 0.20                  |
| 6        | 0.06          | 0.59                   | 0.86                  | 0.05          | 0.66                   | 0.68                  | 0.06          | 0.55                   | 0.37                  | 0.06        | 0.47                   | 0.34                  | 0.03         | 0.41                   | 0.35                  | 0.04         | 0.33                   | 0.19                  | 0.07         | 0.47                   | 0.20                  |
| 8        | 0.13          | 0.87                   | 0.98                  | 0.07          | 0.90                   | 0.90                  | 0.06          | 0.79                   | 0.60                  | 0.06        | 0.67                   | 0.55                  | 0.04         | 0.57                   | 0.51                  | 0.04         | 0.40                   | 0.23                  | 0.07         | 0.48                   | 0.21                  |
| 10       | 0.25          | 0.98                   | 1.00                  | 0.11          | 0.98                   | 0.98                  | 0.08          | 0.93                   | 0.82                  | 0.09        | 0.84                   | 0.77                  | 0.06         | 0.74                   | 0.68                  | 0.04         | 0.49                   | 0.31                  | 0.07         | 0.50                   | 0.22                  |
| 12       | <b>0.38</b>   | <b>1.00</b>            | <b>1.00</b>           | <b>0.18</b>   | <b>1.00</b>            | <b>1.00</b>           | 0.11          | 0.99                   | 0.95                  | 0.12        | 0.94                   | 0.91                  | 0.09         | 0.88                   | 0.83                  | 0.04         | 0.59                   | 0.39                  | 0.07         | 0.52                   | 0.24                  |
| 14       | 0.47          | 1.00                   | 1.00                  | 0.26          | 1.00                   | 1.00                  | 0.18          | 1.00                   | 0.99                  | 0.19        | 0.99                   | 0.97                  | 0.13         | 0.95                   | 0.92                  | 0.04         | 0.70                   | 0.49                  | 0.07         | 0.56                   | 0.26                  |
| 16       | 0.43          | 1.00                   | 1.00                  | 0.32          | 1.00                   | 1.00                  | <b>0.26</b>   | <b>1.00</b>            | <b>1.00</b>           | 0.29        | 1.00                   | 0.99                  | 0.19         | 0.98                   | 0.97                  | 0.04         | 0.79                   | 0.59                  | 0.07         | 0.58                   | 0.28                  |
| 18       | 0.34          | 1.00                   | 1.00                  | 0.35          | 1.00                   | 1.00                  | 0.37          | 1.00                   | 1.00                  | <b>0.39</b> | <b>1.00</b>            | <b>1.00</b>           | 0.24         | 1.00                   | 0.99                  | 0.04         | 0.86                   | 0.68                  | 0.07         | 0.61                   | 0.30                  |
| 20       | 0.22          | 1.00                   | 1.00                  | 0.32          | 1.00                   | 1.00                  | 0.49          | 1.00                   | 1.00                  | 0.50        | 1.00                   | 1.00                  | <b>0.28</b>  | <b>1.00</b>            | <b>1.00</b>           | 0.04         | 0.92                   | 0.77                  | 0.08         | 0.66                   | 0.33                  |
| 22       | 0.14          | 1.00                   | 1.00                  | 0.30          | 1.00                   | 1.00                  | 0.58          | 1.00                   | 1.00                  | 0.56        | 1.00                   | 1.00                  | 0.29         | 1.00                   | 1.00                  | 0.04         | 0.96                   | 0.85                  | 0.07         | 0.69                   | 0.35                  |
| 24       | 0.07          | 1.00                   | 1.00                  | 0.24          | 1.00                   | 1.00                  | 0.65          | 1.00                   | 1.00                  | 0.61        | 1.00                   | 1.00                  | 0.29         | 1.00                   | 1.00                  | 0.04         | 0.98                   | 0.90                  | 0.08         | 0.72                   | 0.38                  |
| 26       | 0.04          | 1.00                   | 1.00                  | 0.19          | 1.00                   | 1.00                  | 0.67          | 1.00                   | 1.00                  | 0.62        | 1.00                   | 1.00                  | 0.28         | 1.00                   | 1.00                  | 0.04         | 0.99                   | 0.94                  | 0.08         | 0.76                   | 0.43                  |
| 28       | 0.02          | 1.00                   | 1.00                  | 0.15          | 1.00                   | 1.00                  | 0.68          | 1.00                   | 1.00                  | 0.57        | 1.00                   | 1.00                  | 0.25         | 1.00                   | 1.00                  | 0.04         | 1.00                   | 0.96                  | 0.08         | 0.79                   | 0.45                  |
| 30       | 0.01          | 1.00                   | 1.00                  | 0.12          | 1.00                   | 1.00                  | 0.66          | 1.00                   | 1.00                  | 0.53        | 1.00                   | 1.00                  | 0.22         | 1.00                   | 1.00                  | 0.04         | 1.00                   | 0.98                  | 0.08         | 0.83                   | 0.49                  |
| 32       | 0.01          | 1.00                   | 1.00                  | 0.09          | 1.00                   | 1.00                  | 0.62          | 1.00                   | 1.00                  | 0.46        | 1.00                   | 1.00                  | 0.18         | 1.00                   | 1.00                  | 0.04         | 1.00                   | 0.99                  | 0.08         | 0.86                   | 0.53                  |
| 34       | 0.01          | 1.00                   | 1.00                  | 0.09          | 1.00                   | 1.00                  | 0.59          | 1.00                   | 1.00                  | 0.39        | 1.00                   | 1.00                  | 0.14         | 1.00                   | 1.00                  | 0.04         | 1.00                   | 0.99                  | 0.08         | 0.89                   | 0.58                  |
| 36       | 0.01          | 1.00                   | 1.00                  | 0.08          | 1.00                   | 1.00                  | 0.53          | 1.00                   | 1.00                  | 0.32        | 1.00                   | 1.00                  | 0.10         | 1.00                   | 1.00                  | <b>0.04</b>  | <b>1.00</b>            | <b>1.00</b>           | 0.09         | 0.91                   | 0.61                  |
| 38       | 0.02          | 1.00                   | 1.00                  | 0.07          | 1.00                   | 1.00                  | 0.45          | 1.00                   | 1.00                  | 0.26        | 1.00                   | 1.00                  | 0.08         | 1.00                   | 1.00                  | 0.04         | 1.00                   | 1.00                  | 0.08         | 0.93                   | 0.65                  |
| 40       | 0.02          | 1.00                   | 1.00                  | 0.07          | 1.00                   | 1.00                  | 0.39          | 1.00                   | 1.00                  | 0.20        | 1.00                   | 1.00                  | 0.06         | 1.00                   | 1.00                  | 0.04         | 1.00                   | 1.00                  | 0.09         | 0.94                   | 0.69                  |

Table 2. Finite sample size (for Zivot–Andrews test) and finite sample power (for robust test for a break), MA(1) case,  $T = 100$ ,  $\lambda = 0.15$

| $\kappa$ | $\phi = -0.8$ |             |             | $\phi = -0.5$ |             |             | $\phi = -0.2$ |             |             | $\phi = 0$  |             |             | $\phi = 0.2$ |             |             | $\phi = 0.5$ |             |             | $\phi = 0.8$ |             |             |
|----------|---------------|-------------|-------------|---------------|-------------|-------------|---------------|-------------|-------------|-------------|-------------|-------------|--------------|-------------|-------------|--------------|-------------|-------------|--------------|-------------|-------------|
|          | ZA            | $t_{HLT}$   | $t_{PY}$    | ZA            | $t_{HLT}$   | $t_{PY}$    | ZA            | $t_{HLT}$   | $t_{PY}$    | ZA          | $t_{HLT}$   | $t_{PY}$    | ZA           | $t_{HLT}$   | $t_{PY}$    | ZA           | $t_{HLT}$   | $t_{PY}$    | ZA           | $t_{HLT}$   | $t_{PY}$    |
| 0        | 0.44          | 0.08        | 0.59        | 0.13          | 0.10        | 0.42        | 0.09          | 0.14        | 0.12        | 0.05        | 0.17        | 0.08        | 0.02         | 0.18        | 0.12        | 0.02         | 0.19        | 0.12        | 0.01         | 0.19        | 0.17        |
| 2        | 0.31          | 0.18        | 0.81        | 0.12          | 0.16        | 0.44        | 0.09          | 0.19        | 0.14        | 0.05        | 0.20        | 0.11        | 0.02         | 0.22        | 0.16        | 0.02         | 0.20        | 0.14        | 0.01         | 0.20        | 0.18        |
| 4        | 0.23          | 0.54        | 0.96        | 0.09          | 0.40        | 0.54        | 0.08          | 0.33        | 0.19        | 0.05        | 0.29        | 0.18        | 0.02         | 0.33        | 0.27        | 0.02         | 0.24        | 0.16        | 0.01         | 0.23        | 0.21        |
| 6        | 0.23          | 0.95        | 0.99        | 0.08          | 0.78        | 0.73        | 0.07          | 0.57        | 0.36        | 0.06        | 0.47        | 0.34        | 0.02         | 0.52        | 0.46        | 0.02         | 0.33        | 0.22        | 0.01         | 0.29        | 0.25        |
| 8        | <b>0.25</b>   | <b>1.00</b> | <b>1.00</b> | 0.08          | 0.97        | 0.91        | 0.07          | 0.81        | 0.59        | 0.06        | 0.67        | 0.55        | 0.02         | 0.72        | 0.67        | 0.02         | 0.43        | 0.29        | 0.01         | 0.36        | 0.31        |
| 10       | 0.29          | 1.00        | 1.00        | 0.11          | 1.00        | 0.98        | 0.09          | 0.94        | 0.82        | 0.09        | 0.84        | 0.77        | 0.03         | 0.87        | 0.84        | 0.02         | 0.57        | 0.40        | 0.01         | 0.46        | 0.38        |
| 12       | 0.32          | 1.00        | 1.00        | <b>0.15</b>   | <b>1.00</b> | <b>1.00</b> | 0.11          | 0.99        | 0.95        | 0.12        | 0.94        | 0.91        | 0.03         | 0.96        | 0.94        | 0.02         | 0.71        | 0.52        | 0.01         | 0.57        | 0.47        |
| 14       | 0.37          | 1.00        | 1.00        | 0.22          | 1.00        | 1.00        | 0.19          | 1.00        | 0.99        | 0.19        | 0.99        | 0.97        | 0.04         | 0.99        | 0.98        | 0.03         | 0.83        | 0.65        | 0.01         | 0.69        | 0.58        |
| 16       | 0.43          | 1.00        | 1.00        | 0.30          | 1.00        | 1.00        | <b>0.28</b>   | <b>1.00</b> | <b>1.00</b> | 0.29        | 1.00        | 0.99        | <b>0.04</b>  | <b>1.00</b> | <b>1.00</b> | 0.03         | 0.91        | 0.76        | 0.01         | 0.80        | 0.66        |
| 18       | 0.50          | 1.00        | 1.00        | 0.39          | 1.00        | 1.00        | 0.40          | 1.00        | 1.00        | <b>0.39</b> | <b>1.00</b> | <b>1.00</b> | 0.05         | 1.00        | 1.00        | 0.03         | 0.95        | 0.85        | 0.01         | 0.87        | 0.75        |
| 20       | 0.57          | 1.00        | 1.00        | 0.44          | 1.00        | 1.00        | 0.53          | 1.00        | 1.00        | 0.50        | 1.00        | 1.00        | 0.03         | 1.00        | 1.00        | 0.03         | 0.98        | 0.92        | 0.01         | 0.93        | 0.83        |
| 22       | 0.61          | 1.00        | 1.00        | 0.49          | 1.00        | 1.00        | 0.63          | 1.00        | 1.00        | 0.56        | 1.00        | 1.00        | 0.03         | 1.00        | 1.00        | 0.03         | 0.99        | 0.96        | 0.01         | 0.97        | 0.89        |
| 24       | 0.64          | 1.00        | 1.00        | 0.52          | 1.00        | 1.00        | 0.71          | 1.00        | 1.00        | 0.61        | 1.00        | 1.00        | 0.02         | 1.00        | 1.00        | 0.02         | 1.00        | 0.98        | 0.01         | 0.98        | 0.93        |
| 26       | 0.65          | 1.00        | 1.00        | 0.52          | 1.00        | 1.00        | 0.74          | 1.00        | 1.00        | 0.62        | 1.00        | 1.00        | 0.02         | 1.00        | 1.00        | 0.02         | 1.00        | 0.99        | 0.01         | 0.99        | 0.96        |
| 28       | 0.62          | 1.00        | 1.00        | 0.53          | 1.00        | 1.00        | 0.75          | 1.00        | 1.00        | 0.57        | 1.00        | 1.00        | 0.01         | 1.00        | 1.00        | <b>0.03</b>  | <b>1.00</b> | <b>1.00</b> | 0.01         | 1.00        | 0.98        |
| 30       | 0.59          | 1.00        | 1.00        | 0.52          | 1.00        | 1.00        | 0.73          | 1.00        | 1.00        | 0.53        | 1.00        | 1.00        | 0.01         | 1.00        | 1.00        | 0.02         | 1.00        | 1.00        | 0.02         | 1.00        | 0.99        |
| 32       | 0.55          | 1.00        | 1.00        | 0.52          | 1.00        | 1.00        | 0.70          | 1.00        | 1.00        | 0.46        | 1.00        | 1.00        | 0.01         | 1.00        | 1.00        | 0.03         | 1.00        | 1.00        | 0.02         | 1.00        | 0.99        |
| 34       | 0.52          | 1.00        | 1.00        | 0.52          | 1.00        | 1.00        | 0.67          | 1.00        | 1.00        | 0.39        | 1.00        | 1.00        | 0.01         | 1.00        | 1.00        | 0.03         | 1.00        | 1.00        | <b>0.02</b>  | <b>1.00</b> | <b>1.00</b> |
| 36       | 0.49          | 1.00        | 1.00        | 0.54          | 1.00        | 1.00        | 0.60          | 1.00        | 1.00        | 0.32        | 1.00        | 1.00        | 0.01         | 1.00        | 1.00        | 0.03         | 1.00        | 1.00        | 0.02         | 1.00        | 1.00        |
| 38       | 0.48          | 1.00        | 1.00        | 0.53          | 1.00        | 1.00        | 0.53          | 1.00        | 1.00        | 0.26        | 1.00        | 1.00        | 0.01         | 1.00        | 1.00        | 0.02         | 1.00        | 1.00        | 0.02         | 1.00        | 1.00        |
| 40       | 0.48          | 1.00        | 1.00        | 0.52          | 1.00        | 1.00        | 0.46          | 1.00        | 1.00        | 0.20        | 1.00        | 1.00        | 0.01         | 1.00        | 1.00        | 0.03         | 1.00        | 1.00        | 0.02         | 1.00        | 1.00        |

Table 3. Finite sample size (for Zivot-Andrews test) and finite sample power (for robust test for a break), AR(1) case,  $T = 200$ ,  $\lambda = 0.15$

| $\kappa$ | $\phi = -0.8$ |             |             | $\phi = -0.5$ |             |             | $\phi = -0.2$ |             |             | $\phi = 0$  |             |             | $\phi = 0.2$ |             |             | $\phi = 0.5$ |             |             | $\phi = 0.8$ |           |          |
|----------|---------------|-------------|-------------|---------------|-------------|-------------|---------------|-------------|-------------|-------------|-------------|-------------|--------------|-------------|-------------|--------------|-------------|-------------|--------------|-----------|----------|
|          | ZA            | $t_{HLT}$   | $t_{PY}$    | ZA            | $t_{HLT}$   | $t_{PY}$    | ZA            | $t_{HLT}$   | $t_{PY}$    | ZA          | $t_{HLT}$   | $t_{PY}$    | ZA           | $t_{HLT}$   | $t_{PY}$    | ZA           | $t_{HLT}$   | $t_{PY}$    | ZA           | $t_{HLT}$ | $t_{PY}$ |
| 0        | 0.03          | 0.08        | 0.09        | 0.04          | 0.08        | 0.08        | 0.05          | 0.10        | 0.09        | 0.04        | 0.12        | 0.06        | 0.02         | 0.13        | 0.09        | 0.04         | 0.18        | 0.08        | 0.05         | 0.42      | 0.12     |
| 2        | 0.04          | 0.10        | 0.18        | 0.04          | 0.13        | 0.14        | 0.04          | 0.14        | 0.12        | 0.04        | 0.14        | 0.09        | 0.02         | 0.15        | 0.11        | 0.04         | 0.19        | 0.09        | 0.05         | 0.42      | 0.12     |
| 4        | 0.04          | 0.22        | 0.50        | 0.04          | 0.31        | 0.34        | 0.04          | 0.28        | 0.21        | 0.04        | 0.24        | 0.17        | 0.02         | 0.22        | 0.16        | 0.04         | 0.22        | 0.10        | 0.05         | 0.43      | 0.12     |
| 6        | 0.08          | 0.54        | 0.86        | 0.05          | 0.64        | 0.68        | 0.04          | 0.52        | 0.40        | 0.04        | 0.42        | 0.33        | 0.02         | 0.34        | 0.26        | 0.04         | 0.27        | 0.14        | 0.05         | 0.44      | 0.13     |
| 8        | 0.15          | 0.88        | 0.98        | 0.09          | 0.90        | 0.92        | 0.06          | 0.78        | 0.66        | 0.06        | 0.65        | 0.56        | 0.03         | 0.51        | 0.42        | 0.05         | 0.36        | 0.19        | 0.05         | 0.46      | 0.14     |
| 10       | <b>0.22</b>   | 0.99        | 1.00        | 0.15          | 0.99        | 0.99        | 0.09          | 0.94        | 0.86        | 0.09        | 0.84        | 0.77        | 0.04         | 0.69        | 0.59        | 0.04         | 0.46        | 0.28        | 0.05         | 0.48      | 0.15     |
| 12       | <b>0.19</b>   | <b>1.00</b> | <b>1.00</b> | <b>0.19</b>   | <b>1.00</b> | <b>1.00</b> | 0.13          | 0.99        | 0.96        | 0.13        | 0.95        | 0.91        | 0.05         | 0.83        | 0.74        | 0.04         | 0.56        | 0.36        | 0.05         | 0.50      | 0.16     |
| 14       | 0.12          | 1.00        | 1.00        | 0.19          | 1.00        | 1.00        | 0.17          | 1.00        | 0.99        | 0.17        | 0.99        | 0.97        | 0.06         | 0.93        | 0.87        | 0.04         | 0.67        | 0.45        | 0.05         | 0.53      | 0.18     |
| 16       | 0.06          | 1.00        | 1.00        | 0.13          | 1.00        | 1.00        | <b>0.20</b>   | <b>1.00</b> | <b>1.00</b> | <b>0.22</b> | <b>1.00</b> | <b>1.00</b> | 0.07         | 0.98        | 0.95        | 0.04         | 0.77        | 0.56        | 0.05         | 0.56      | 0.19     |
| 18       | 0.02          | 1.00        | 1.00        | 0.08          | 1.00        | 1.00        | 0.22          | 1.00        | 1.00        | 0.26        | 1.00        | 1.00        | 0.09         | 0.99        | 0.98        | 0.04         | 0.86        | 0.67        | 0.05         | 0.60      | 0.22     |
| 20       | 0.02          | 1.00        | 1.00        | 0.05          | 1.00        | 1.00        | 0.20          | 1.00        | 1.00        | 0.26        | 1.00        | 1.00        | 0.09         | 1.00        | 0.99        | 0.04         | 0.91        | 0.77        | 0.05         | 0.63      | 0.24     |
| 22       | 0.01          | 1.00        | 1.00        | 0.02          | 1.00        | 1.00        | 0.15          | 1.00        | 1.00        | 0.22        | 1.00        | 1.00        | <b>0.10</b>  | <b>1.00</b> | <b>1.00</b> | 0.04         | 0.96        | 0.85        | 0.05         | 0.67      | 0.28     |
| 24       | 0.01          | 1.00        | 1.00        | 0.01          | 1.00        | 1.00        | 0.11          | 1.00        | 1.00        | 0.18        | 1.00        | 1.00        | 0.10         | 1.00        | 1.00        | 0.04         | 0.98        | 0.90        | 0.05         | 0.71      | 0.30     |
| 26       | 0.01          | 1.00        | 1.00        | 0.01          | 1.00        | 1.00        | 0.07          | 1.00        | 1.00        | 0.13        | 1.00        | 1.00        | 0.10         | 1.00        | 1.00        | 0.05         | 0.99        | 0.95        | 0.04         | 0.74      | 0.33     |
| 28       | 0.01          | 1.00        | 1.00        | 0.01          | 1.00        | 1.00        | 0.05          | 1.00        | 1.00        | 0.09        | 1.00        | 1.00        | 0.09         | 1.00        | 1.00        | 0.05         | 1.00        | 0.97        | 0.05         | 0.78      | 0.37     |
| 30       | 0.01          | 1.00        | 1.00        | 0.01          | 1.00        | 1.00        | 0.03          | 1.00        | 1.00        | 0.06        | 1.00        | 1.00        | 0.08         | 1.00        | 1.00        | 0.05         | 1.00        | 0.99        | 0.05         | 0.81      | 0.40     |
| 32       | 0.01          | 1.00        | 1.00        | 0.01          | 1.00        | 1.00        | 0.02          | 1.00        | 1.00        | 0.04        | 1.00        | 1.00        | 0.07         | 1.00        | 1.00        | 0.05         | 1.00        | 0.99        | 0.05         | 0.85      | 0.45     |
| 34       | 0.01          | 1.00        | 1.00        | 0.01          | 1.00        | 1.00        | 0.02          | 1.00        | 1.00        | 0.03        | 1.00        | 1.00        | 0.06         | 1.00        | 1.00        | <b>0.05</b>  | <b>1.00</b> | <b>1.00</b> | 0.05         | 0.87      | 0.49     |
| 36       | 0.01          | 1.00        | 1.00        | 0.01          | 1.00        | 1.00        | 0.02          | 1.00        | 1.00        | 0.02        | 1.00        | 1.00        | 0.05         | 1.00        | 1.00        | 0.05         | 1.00        | 1.00        | 0.05         | 0.90      | 0.53     |
| 38       | 0.01          | 1.00        | 1.00        | 0.01          | 1.00        | 1.00        | 0.01          | 1.00        | 1.00        | 0.01        | 1.00        | 1.00        | 0.04         | 1.00        | 1.00        | 0.05         | 1.00        | 1.00        | 0.05         | 0.92      | 0.57     |
| 40       | 0.01          | 1.00        | 1.00        | 0.01          | 1.00        | 1.00        | 0.02          | 1.00        | 1.00        | 0.01        | 1.00        | 1.00        | 0.03         | 1.00        | 1.00        | 0.05         | 1.00        | 1.00        | 0.05         | 0.93      | 0.60     |

Table 4. Finite sample size (for Zivot-Andrews test) and finite sample power (for robust test for a break), MA(1) case,  $T = 200$ ,  $\lambda = 0.15$

| $\kappa$ | $\phi = -0.8$ |             |             | $\phi = -0.5$ |             |             | $\phi = -0.2$ |             |             | $\phi = 0$  |             |             | $\phi = 0.2$ |             |             | $\phi = 0.5$ |             |             | $\phi = 0.8$ |             |             |
|----------|---------------|-------------|-------------|---------------|-------------|-------------|---------------|-------------|-------------|-------------|-------------|-------------|--------------|-------------|-------------|--------------|-------------|-------------|--------------|-------------|-------------|
|          | ZA            | $t_{HLT}$   | $t_{PY}$    | ZA            | $t_{HLT}$   | $t_{PY}$    | ZA            | $t_{HLT}$   | $t_{PY}$    | ZA          | $t_{HLT}$   | $t_{PY}$    | ZA           | $t_{HLT}$   | $t_{PY}$    | ZA           | $t_{HLT}$   | $t_{PY}$    | ZA           | $t_{HLT}$   | $t_{PY}$    |
| 0        | 0.19          | 0.15        | 0.73        | 0.07          | 0.07        | 0.23        | 0.06          | 0.10        | 0.10        | 0.04        | 0.12        | 0.06        | 0.02         | 0.12        | 0.09        | 0.03         | 0.13        | 0.09        | 0.01         | 0.13        | 0.11        |
| 2        | 0.11          | 0.19        | 0.82        | 0.06          | 0.11        | 0.25        | 0.05          | 0.13        | 0.12        | 0.04        | 0.14        | 0.09        | 0.02         | 0.14        | 0.11        | 0.02         | 0.14        | 0.10        | 0.01         | 0.14        | 0.11        |
| 4        | 0.10          | 0.49        | 0.93        | 0.06          | 0.35        | 0.41        | 0.05          | 0.28        | 0.21        | 0.04        | 0.24        | 0.17        | 0.02         | 0.22        | 0.18        | 0.03         | 0.19        | 0.14        | 0.01         | 0.18        | 0.14        |
| 6        | 0.14          | 0.98        | 1.00        | 0.06          | 0.78        | 0.73        | 0.05          | 0.54        | 0.39        | 0.04        | 0.42        | 0.33        | 0.02         | 0.36        | 0.30        | 0.02         | 0.27        | 0.19        | 0.01         | 0.23        | 0.18        |
| 8        | <b>0.22</b>   | <b>1.00</b> | <b>1.00</b> | 0.10          | 0.98        | 0.95        | 0.06          | 0.80        | 0.65        | 0.06        | 0.65        | 0.56        | 0.04         | 0.56        | 0.48        | 0.03         | 0.40        | 0.29        | 0.01         | 0.32        | 0.25        |
| 10       | 0.25          | 1.00        | 1.00        | <b>0.16</b>   | <b>1.00</b> | <b>1.00</b> | 0.10          | 0.95        | 0.86        | 0.09        | 0.84        | 0.77        | 0.05         | 0.74        | 0.67        | 0.03         | 0.55        | 0.41        | 0.01         | 0.43        | 0.34        |
| 12       | 0.22          | 1.00        | 1.00        | 0.22          | 1.00        | 1.00        | 0.14          | 0.99        | 0.96        | 0.13        | 0.95        | 0.91        | 0.06         | 0.88        | 0.82        | 0.03         | 0.68        | 0.54        | 0.01         | 0.54        | 0.43        |
| 14       | 0.16          | 1.00        | 1.00        | 0.24          | 1.00        | 1.00        | 0.19          | 1.00        | 0.99        | 0.17        | 0.99        | 0.97        | 0.08         | 0.95        | 0.92        | 0.03         | 0.81        | 0.67        | 0.01         | 0.66        | 0.53        |
| 16       | 0.12          | 1.00        | 1.00        | 0.20          | 1.00        | 1.00        | <b>0.24</b>   | <b>1.00</b> | <b>1.00</b> | <b>0.22</b> | <b>1.00</b> | <b>1.00</b> | 0.10         | 0.99        | 0.98        | 0.03         | 0.91        | 0.79        | 0.01         | 0.78        | 0.64        |
| 18       | 0.09          | 1.00        | 1.00        | 0.14          | 1.00        | 1.00        | 0.26          | 1.00        | 1.00        | 0.26        | 1.00        | 1.00        | 0.12         | 1.00        | 0.99        | 0.04         | 0.96        | 0.88        | 0.01         | 0.87        | 0.75        |
| 20       | 0.09          | 1.00        | 1.00        | 0.09          | 1.00        | 1.00        | 0.25          | 1.00        | 1.00        | 0.26        | 1.00        | 1.00        | <b>0.12</b>  | <b>1.00</b> | <b>1.00</b> | 0.04         | 0.99        | 0.94        | 0.02         | 0.93        | 0.83        |
| 22       | 0.09          | 1.00        | 1.00        | 0.05          | 1.00        | 1.00        | 0.19          | 1.00        | 1.00        | 0.22        | 1.00        | 1.00        | 0.13         | 1.00        | 1.00        | 0.04         | 1.00        | 0.98        | 0.01         | 0.97        | 0.90        |
| 24       | 0.09          | 1.00        | 1.00        | 0.04          | 1.00        | 1.00        | 0.14          | 1.00        | 1.00        | 0.18        | 1.00        | 1.00        | 0.12         | 1.00        | 1.00        | 0.04         | 1.00        | 0.99        | 0.01         | 0.99        | 0.94        |
| 26       | 0.08          | 1.00        | 1.00        | 0.03          | 1.00        | 1.00        | 0.10          | 1.00        | 1.00        | 0.13        | 1.00        | 1.00        | 0.12         | 1.00        | 1.00        | <b>0.04</b>  | <b>1.00</b> | <b>1.00</b> | 0.01         | 1.00        | 0.97        |
| 28       | 0.09          | 1.00        | 1.00        | 0.03          | 1.00        | 1.00        | 0.07          | 1.00        | 1.00        | 0.09        | 1.00        | 1.00        | 0.10         | 1.00        | 1.00        | 0.04         | 1.00        | 1.00        | 0.01         | 1.00        | 0.98        |
| 30       | 0.09          | 1.00        | 1.00        | 0.03          | 1.00        | 1.00        | 0.04          | 1.00        | 1.00        | 0.06        | 1.00        | 1.00        | 0.08         | 1.00        | 1.00        | 0.03         | 1.00        | 1.00        | 0.01         | 1.00        | 0.99        |
| 32       | 0.09          | 1.00        | 1.00        | 0.03          | 1.00        | 1.00        | 0.03          | 1.00        | 1.00        | 0.04        | 1.00        | 1.00        | 0.07         | 1.00        | 1.00        | 0.04         | 1.00        | 1.00        | <b>0.01</b>  | <b>1.00</b> | <b>1.00</b> |
| 34       | 0.09          | 1.00        | 1.00        | 0.03          | 1.00        | 1.00        | 0.02          | 1.00        | 1.00        | 0.03        | 1.00        | 1.00        | 0.05         | 1.00        | 1.00        | 0.03         | 1.00        | 1.00        | 0.01         | 1.00        | 1.00        |
| 36       | 0.09          | 1.00        | 1.00        | 0.03          | 1.00        | 1.00        | 0.02          | 1.00        | 1.00        | 0.02        | 1.00        | 1.00        | 0.04         | 1.00        | 1.00        | 0.03         | 1.00        | 1.00        | 0.01         | 1.00        | 1.00        |
| 38       | 0.09          | 1.00        | 1.00        | 0.03          | 1.00        | 1.00        | 0.02          | 1.00        | 1.00        | 0.01        | 1.00        | 1.00        | 0.03         | 1.00        | 1.00        | 0.02         | 1.00        | 1.00        | 0.01         | 1.00        | 1.00        |
| 40       | 0.09          | 1.00        | 1.00        | 0.03          | 1.00        | 1.00        | 0.02          | 1.00        | 1.00        | 0.01        | 1.00        | 1.00        | 0.02         | 1.00        | 1.00        | 0.02         | 1.00        | 1.00        | 0.01         | 1.00        | 1.00        |

Table 5. Finite sample size (for Zivot–Andrews test) and finite sample power (for robust test for a break), AR(1) case,  $T = 100$ ,  $\lambda = 0.2$

| $\kappa$ | $\phi = -0.8$ |             |             | $\phi = -0.5$ |             |             | $\phi = -0.2$ |             |             | $\phi = 0$  |             |             | $\phi = 0.2$ |             |             | $\phi = 0.5$ |             |             | $\phi = 0.8$ |           |          |
|----------|---------------|-------------|-------------|---------------|-------------|-------------|---------------|-------------|-------------|-------------|-------------|-------------|--------------|-------------|-------------|--------------|-------------|-------------|--------------|-----------|----------|
|          | ZA            | $t_{HLT}$   | $t_{PY}$    | ZA            | $t_{HLT}$   | $t_{PY}$    | ZA            | $t_{HLT}$   | $t_{PY}$    | ZA          | $t_{HLT}$   | $t_{PY}$    | ZA           | $t_{HLT}$   | $t_{PY}$    | ZA           | $t_{HLT}$   | $t_{PY}$    | ZA           | $t_{HLT}$ | $t_{PY}$ |
| 0        | 0.04          | 0.11        | 0.14        | 0.04          | 0.12        | 0.15        | 0.07          | 0.15        | 0.11        | 0.05        | 0.17        | 0.08        | 0.02         | 0.18        | 0.13        | 0.04         | 0.24        | 0.13        | 0.06         | 0.44      | 0.19     |
| 2        | 0.04          | 0.17        | 0.30        | 0.04          | 0.22        | 0.24        | 0.07          | 0.22        | 0.15        | 0.05        | 0.22        | 0.12        | 0.02         | 0.22        | 0.16        | 0.04         | 0.25        | 0.13        | 0.06         | 0.44      | 0.19     |
| 4        | 0.03          | 0.40        | 0.70        | 0.03          | 0.49        | 0.53        | 0.06          | 0.42        | 0.27        | 0.05        | 0.37        | 0.26        | 0.02         | 0.33        | 0.27        | 0.04         | 0.29        | 0.17        | 0.06         | 0.46      | 0.20     |
| 6        | 0.03          | 0.76        | 0.95        | 0.03          | 0.82        | 0.84        | 0.05          | 0.70        | 0.53        | 0.04        | 0.59        | 0.49        | 0.02         | 0.52        | 0.46        | 0.03         | 0.38        | 0.23        | 0.07         | 0.48      | 0.21     |
| 8        | 0.04          | 0.96        | 1.00        | 0.03          | 0.97        | 0.97        | 0.05          | 0.90        | 0.79        | 0.04        | 0.80        | 0.74        | 0.02         | 0.71        | 0.67        | 0.03         | 0.48        | 0.31        | 0.06         | 0.50      | 0.23     |
| 10       | <b>0.05</b>   | <b>1.00</b> | <b>1.00</b> | <b>0.03</b>   | <b>1.00</b> | <b>1.00</b> | 0.05          | 0.98        | 0.95        | 0.05        | 0.94        | 0.90        | 0.03         | 0.87        | 0.83        | 0.03         | 0.59        | 0.42        | 0.06         | 0.53      | 0.25     |
| 12       | 0.04          | 1.00        | 1.00        | 0.03          | 1.00        | 1.00        | 0.05          | 1.00        | 0.99        | 0.05        | 0.98        | 0.98        | 0.03         | 0.95        | 0.93        | 0.03         | 0.71        | 0.54        | 0.06         | 0.55      | 0.27     |
| 14       | 0.03          | 1.00        | 1.00        | 0.03          | 1.00        | 1.00        | <b>0.07</b>   | <b>1.00</b> | <b>1.00</b> | <b>0.07</b> | <b>1.00</b> | <b>1.00</b> | 0.04         | 0.99        | 0.98        | 0.03         | 0.81        | 0.66        | 0.06         | 0.60      | 0.31     |
| 16       | 0.02          | 1.00        | 1.00        | 0.03          | 1.00        | 1.00        | 0.09          | 1.00        | 1.00        | 0.09        | 1.00        | 1.00        | <b>0.04</b>  | <b>1.00</b> | <b>1.00</b> | 0.03         | 0.89        | 0.77        | 0.06         | 0.64      | 0.34     |
| 18       | 0.02          | 1.00        | 1.00        | 0.03          | 1.00        | 1.00        | 0.11          | 1.00        | 1.00        | 0.10        | 1.00        | 1.00        | 0.04         | 1.00        | 1.00        | 0.03         | 0.93        | 0.84        | 0.06         | 0.67      | 0.38     |
| 20       | 0.02          | 1.00        | 1.00        | 0.02          | 1.00        | 1.00        | 0.11          | 1.00        | 1.00        | 0.09        | 1.00        | 1.00        | 0.03         | 1.00        | 1.00        | 0.03         | 0.97        | 0.91        | 0.06         | 0.72      | 0.42     |
| 22       | 0.01          | 1.00        | 1.00        | 0.02          | 1.00        | 1.00        | 0.10          | 1.00        | 1.00        | 0.08        | 1.00        | 1.00        | 0.03         | 1.00        | 1.00        | 0.03         | 0.99        | 0.95        | 0.06         | 0.76      | 0.47     |
| 24       | 0.02          | 1.00        | 1.00        | 0.02          | 1.00        | 1.00        | 0.08          | 1.00        | 1.00        | 0.06        | 1.00        | 1.00        | 0.02         | 1.00        | 1.00        | 0.02         | 1.00        | 0.98        | 0.06         | 0.79      | 0.50     |
| 26       | 0.01          | 1.00        | 1.00        | 0.02          | 1.00        | 1.00        | 0.07          | 1.00        | 1.00        | 0.05        | 1.00        | 1.00        | 0.01         | 1.00        | 1.00        | 0.02         | 1.00        | 0.99        | 0.06         | 0.83      | 0.55     |
| 28       | 0.01          | 1.00        | 1.00        | 0.02          | 1.00        | 1.00        | 0.05          | 1.00        | 1.00        | 0.03        | 1.00        | 1.00        | 0.01         | 1.00        | 1.00        | <b>0.03</b>  | <b>1.00</b> | <b>1.00</b> | 0.06         | 0.86      | 0.60     |
| 30       | 0.01          | 1.00        | 1.00        | 0.02          | 1.00        | 1.00        | 0.04          | 1.00        | 1.00        | 0.02        | 1.00        | 1.00        | 0.01         | 1.00        | 1.00        | 0.03         | 1.00        | 1.00        | 0.05         | 0.89      | 0.65     |
| 32       | 0.01          | 1.00        | 1.00        | 0.02          | 1.00        | 1.00        | 0.04          | 1.00        | 1.00        | 0.02        | 1.00        | 1.00        | 0.01         | 1.00        | 1.00        | 0.03         | 1.00        | 1.00        | 0.06         | 0.92      | 0.69     |
| 34       | 0.01          | 1.00        | 1.00        | 0.02          | 1.00        | 1.00        | 0.04          | 1.00        | 1.00        | 0.02        | 1.00        | 1.00        | 0.01         | 1.00        | 1.00        | 0.02         | 1.00        | 1.00        | 0.06         | 0.94      | 0.73     |
| 36       | 0.01          | 1.00        | 1.00        | 0.02          | 1.00        | 1.00        | 0.04          | 1.00        | 1.00        | 0.02        | 1.00        | 1.00        | 0.01         | 1.00        | 1.00        | 0.03         | 1.00        | 1.00        | 0.06         | 0.95      | 0.77     |
| 38       | 0.01          | 1.00        | 1.00        | 0.02          | 1.00        | 1.00        | 0.03          | 1.00        | 1.00        | 0.02        | 1.00        | 1.00        | 0.01         | 1.00        | 1.00        | 0.03         | 1.00        | 1.00        | 0.05         | 0.97      | 0.81     |
| 40       | 0.01          | 1.00        | 1.00        | 0.02          | 1.00        | 1.00        | 0.04          | 1.00        | 1.00        | 0.02        | 1.00        | 1.00        | 0.01         | 1.00        | 1.00        | 0.03         | 1.00        | 1.00        | 0.06         | 0.97      | 0.84     |



Table 6. Finite sample size (for Zivot–Andrews test) and finite sample power (for robust test for a break), MA(1) case,  $T = 100$ ,  $\lambda = 0.2$

| $\kappa$ | $\phi = -0.8$ |             |             | $\phi = -0.5$ |             |             | $\phi = -0.2$ |             |             | $\phi = 0$  |             |             | $\phi = 0.2$ |             |             | $\phi = 0.5$ |             |             | $\phi = 0.8$ |             |             |
|----------|---------------|-------------|-------------|---------------|-------------|-------------|---------------|-------------|-------------|-------------|-------------|-------------|--------------|-------------|-------------|--------------|-------------|-------------|--------------|-------------|-------------|
|          | ZA            | $t_{HLT}$   | $t_{PY}$    | ZA            | $t_{HLT}$   | $t_{PY}$    | ZA            | $t_{HLT}$   | $t_{PY}$    | ZA          | $t_{HLT}$   | $t_{PY}$    | ZA           | $t_{HLT}$   | $t_{PY}$    | ZA           | $t_{HLT}$   | $t_{PY}$    | ZA           | $t_{HLT}$   | $t_{PY}$    |
| 0        | 0.44          | 0.08        | 0.59        | 0.13          | 0.10        | 0.42        | 0.09          | 0.14        | 0.12        | 0.05        | 0.17        | 0.08        | 0.02         | 0.18        | 0.12        | 0.02         | 0.19        | 0.12        | 0.01         | 0.19        | 0.17        |
| 2        | 0.31          | 0.27        | 0.92        | 0.11          | 0.21        | 0.47        | 0.08          | 0.22        | 0.16        | 0.05        | 0.22        | 0.12        | 0.02         | 0.22        | 0.16        | 0.02         | 0.21        | 0.14        | 0.01         | 0.21        | 0.19        |
| 4        | 0.29          | 0.78        | 0.98        | 0.08          | 0.57        | 0.65        | 0.07          | 0.43        | 0.27        | 0.05        | 0.37        | 0.26        | 0.01         | 0.32        | 0.25        | 0.02         | 0.28        | 0.19        | 0.01         | 0.25        | 0.23        |
| 6        | <b>0.30</b>   | <b>1.00</b> | <b>1.00</b> | 0.07          | 0.91        | 0.88        | 0.06          | 0.72        | 0.52        | 0.04        | 0.59        | 0.49        | 0.02         | 0.50        | 0.42        | 0.02         | 0.40        | 0.28        | 0.01         | 0.34        | 0.30        |
| 8        | 0.30          | 1.00        | 1.00        | 0.08          | 1.00        | 0.98        | 0.06          | 0.92        | 0.79        | 0.04        | 0.80        | 0.74        | 0.02         | 0.69        | 0.62        | 0.01         | 0.55        | 0.40        | 0.01         | 0.45        | 0.39        |
| 10       | 0.30          | 1.00        | 1.00        | <b>0.08</b>   | <b>1.00</b> | <b>1.00</b> | 0.06          | 0.99        | 0.95        | 0.05        | 0.94        | 0.90        | 0.03         | 0.85        | 0.79        | 0.02         | 0.70        | 0.54        | 0.01         | 0.58        | 0.50        |
| 12       | 0.30          | 1.00        | 1.00        | 0.08          | 1.00        | 1.00        | 0.06          | 1.00        | 0.99        | 0.05        | 0.98        | 0.98        | 0.03         | 0.95        | 0.91        | 0.01         | 0.83        | 0.70        | 0.01         | 0.71        | 0.61        |
| 14       | 0.30          | 1.00        | 1.00        | 0.09          | 1.00        | 1.00        | <b>0.08</b>   | <b>1.00</b> | <b>1.00</b> | <b>0.07</b> | <b>1.00</b> | <b>1.00</b> | 0.03         | 0.98        | 0.97        | 0.01         | 0.92        | 0.82        | 0.01         | 0.82        | 0.72        |
| 16       | 0.29          | 1.00        | 1.00        | 0.09          | 1.00        | 1.00        | 0.10          | 1.00        | 1.00        | 0.09        | 1.00        | 1.00        | 0.03         | 1.00        | 0.99        | 0.01         | 0.97        | 0.91        | 0.01         | 0.90        | 0.82        |
| 18       | 0.29          | 1.00        | 1.00        | 0.10          | 1.00        | 1.00        | 0.13          | 1.00        | 1.00        | 0.10        | 1.00        | 1.00        | <b>0.03</b>  | <b>1.00</b> | <b>1.00</b> | 0.01         | 0.99        | 0.96        | 0.01         | 0.95        | 0.89        |
| 20       | 0.29          | 1.00        | 1.00        | 0.11          | 1.00        | 1.00        | 0.14          | 1.00        | 1.00        | 0.09        | 1.00        | 1.00        | 0.02         | 1.00        | 1.00        | 0.01         | 1.00        | 0.98        | 0.01         | 0.98        | 0.94        |
| 22       | 0.28          | 1.00        | 1.00        | 0.11          | 1.00        | 1.00        | 0.13          | 1.00        | 1.00        | 0.08        | 1.00        | 1.00        | 0.02         | 1.00        | 1.00        | <b>0.01</b>  | <b>1.00</b> | <b>1.00</b> | 0.01         | 0.99        | 0.97        |
| 24       | 0.26          | 1.00        | 1.00        | 0.10          | 1.00        | 1.00        | 0.10          | 1.00        | 1.00        | 0.06        | 1.00        | 1.00        | 0.01         | 1.00        | 1.00        | 0.01         | 1.00        | 1.00        | 0.01         | 1.00        | 0.98        |
| 26       | 0.26          | 1.00        | 1.00        | 0.09          | 1.00        | 1.00        | 0.08          | 1.00        | 1.00        | 0.05        | 1.00        | 1.00        | 0.01         | 1.00        | 1.00        | 0.01         | 1.00        | 1.00        | 0.01         | 1.00        | 0.99        |
| 28       | 0.25          | 1.00        | 1.00        | 0.08          | 1.00        | 1.00        | 0.07          | 1.00        | 1.00        | 0.03        | 1.00        | 1.00        | 0.01         | 1.00        | 1.00        | 0.01         | 1.00        | 1.00        | <b>0.01</b>  | <b>1.00</b> | <b>1.00</b> |
| 30       | 0.25          | 1.00        | 1.00        | 0.08          | 1.00        | 1.00        | 0.06          | 1.00        | 1.00        | 0.02        | 1.00        | 1.00        | 0.01         | 1.00        | 1.00        | 0.02         | 1.00        | 1.00        | 0.01         | 1.00        | 1.00        |
| 32       | 0.24          | 1.00        | 1.00        | 0.08          | 1.00        | 1.00        | 0.05          | 1.00        | 1.00        | 0.02        | 1.00        | 1.00        | 0.01         | 1.00        | 1.00        | 0.02         | 1.00        | 1.00        | 0.01         | 1.00        | 1.00        |
| 34       | 0.23          | 1.00        | 1.00        | 0.07          | 1.00        | 1.00        | 0.05          | 1.00        | 1.00        | 0.02        | 1.00        | 1.00        | 0.01         | 1.00        | 1.00        | 0.01         | 1.00        | 1.00        | 0.01         | 1.00        | 1.00        |
| 36       | 0.22          | 1.00        | 1.00        | 0.08          | 1.00        | 1.00        | 0.05          | 1.00        | 1.00        | 0.02        | 1.00        | 1.00        | 0.01         | 1.00        | 1.00        | 0.02         | 1.00        | 1.00        | 0.01         | 1.00        | 1.00        |
| 38       | 0.22          | 1.00        | 1.00        | 0.08          | 1.00        | 1.00        | 0.05          | 1.00        | 1.00        | 0.02        | 1.00        | 1.00        | 0.01         | 1.00        | 1.00        | 0.02         | 1.00        | 1.00        | 0.01         | 1.00        | 1.00        |
| 40       | 0.22          | 1.00        | 1.00        | 0.07          | 1.00        | 1.00        | 0.05          | 1.00        | 1.00        | 0.02        | 1.00        | 1.00        | 0.01         | 1.00        | 1.00        | 0.02         | 1.00        | 1.00        | 0.01         | 1.00        | 1.00        |

Table 7. Finite sample size (for Zivot-Andrews test) and finite sample power (for robust test for a break), AR(1) case,  $T = 200$ ,  $\lambda = 0.2$

| $\kappa$ | $\phi = -0.8$ |             |             | $\phi = -0.5$ |             |             | $\phi = -0.2$ |             |             | $\phi = 0$  |             |             | $\phi = 0.2$ |             |             | $\phi = 0.5$ |             |             | $\phi = 0.8$ |           |          |
|----------|---------------|-------------|-------------|---------------|-------------|-------------|---------------|-------------|-------------|-------------|-------------|-------------|--------------|-------------|-------------|--------------|-------------|-------------|--------------|-----------|----------|
|          | ZA            | $t_{HLT}$   | $t_{PY}$    | ZA            | $t_{HLT}$   | $t_{PY}$    | ZA            | $t_{HLT}$   | $t_{PY}$    | ZA          | $t_{HLT}$   | $t_{PY}$    | ZA           | $t_{HLT}$   | $t_{PY}$    | ZA           | $t_{HLT}$   | $t_{PY}$    | ZA           | $t_{HLT}$ | $t_{PY}$ |
| 0        | 0.03          | 0.08        | 0.09        | 0.04          | 0.08        | 0.08        | 0.05          | 0.10        | 0.09        | 0.04        | 0.12        | 0.06        | 0.02         | 0.13        | 0.09        | 0.04         | 0.18        | 0.08        | 0.05         | 0.42      | 0.12     |
| 2        | 0.03          | 0.12        | 0.24        | 0.04          | 0.15        | 0.17        | 0.04          | 0.16        | 0.13        | 0.04        | 0.16        | 0.10        | 0.02         | 0.16        | 0.12        | 0.04         | 0.19        | 0.09        | 0.05         | 0.42      | 0.12     |
| 4        | 0.03          | 0.33        | 0.68        | 0.03          | 0.44        | 0.50        | 0.04          | 0.37        | 0.30        | 0.04        | 0.31        | 0.24        | 0.02         | 0.26        | 0.21        | 0.04         | 0.25        | 0.12        | 0.05         | 0.43      | 0.13     |
| 6        | 0.03          | 0.74        | 0.96        | 0.03          | 0.80        | 0.85        | 0.03          | 0.67        | 0.58        | 0.03        | 0.55        | 0.48        | 0.02         | 0.44        | 0.37        | 0.04         | 0.32        | 0.18        | 0.05         | 0.45      | 0.14     |
| 8        | 0.04          | 0.97        | 1.00        | 0.03          | 0.97        | 0.98        | 0.03          | 0.90        | 0.84        | 0.04        | 0.80        | 0.75        | 0.02         | 0.65        | 0.58        | 0.04         | 0.44        | 0.27        | 0.05         | 0.47      | 0.15     |
| 10       | <b>0.04</b>   | <b>1.00</b> | <b>1.00</b> | <b>0.04</b>   | <b>1.00</b> | <b>1.00</b> | 0.04          | 0.98        | 0.96        | 0.04        | 0.93        | 0.92        | 0.02         | 0.82        | 0.77        | 0.04         | 0.56        | 0.39        | 0.05         | 0.51      | 0.18     |
| 12       | 0.02          | 1.00        | 1.00        | 0.04          | 1.00        | 1.00        | <b>0.04</b>   | <b>1.00</b> | <b>1.00</b> | 0.05        | 0.99        | 0.98        | 0.02         | 0.93        | 0.90        | 0.03         | 0.68        | 0.50        | 0.05         | 0.54      | 0.20     |
| 14       | 0.02          | 1.00        | 1.00        | 0.02          | 1.00        | 1.00        | 0.04          | 1.00        | 1.00        | <b>0.06</b> | <b>1.00</b> | <b>1.00</b> | 0.02         | 0.98        | 0.96        | 0.03         | 0.79        | 0.63        | 0.04         | 0.57      | 0.22     |
| 16       | 0.01          | 1.00        | 1.00        | 0.02          | 1.00        | 1.00        | 0.04          | 1.00        | 1.00        | 0.06        | 1.00        | 1.00        | 0.02         | 1.00        | 0.99        | 0.03         | 0.88        | 0.75        | 0.05         | 0.61      | 0.25     |
| 18       | 0.01          | 1.00        | 1.00        | 0.01          | 1.00        | 1.00        | 0.03          | 1.00        | 1.00        | 0.05        | 1.00        | 1.00        | <b>0.02</b>  | <b>1.00</b> | <b>1.00</b> | 0.03         | 0.94        | 0.85        | 0.04         | 0.65      | 0.29     |
| 20       | 0.01          | 1.00        | 1.00        | 0.02          | 1.00        | 1.00        | 0.03          | 1.00        | 1.00        | 0.04        | 1.00        | 1.00        | 0.02         | 1.00        | 1.00        | 0.03         | 0.97        | 0.91        | 0.04         | 0.69      | 0.32     |
| 22       | 0.01          | 1.00        | 1.00        | 0.01          | 1.00        | 1.00        | 0.02          | 1.00        | 1.00        | 0.03        | 1.00        | 1.00        | 0.01         | 1.00        | 1.00        | 0.02         | 0.99        | 0.96        | 0.04         | 0.74      | 0.38     |
| 24       | 0.01          | 1.00        | 1.00        | 0.01          | 1.00        | 1.00        | 0.02          | 1.00        | 1.00        | 0.02        | 1.00        | 1.00        | 0.01         | 1.00        | 1.00        | 0.02         | 1.00        | 0.98        | 0.04         | 0.78      | 0.41     |
| 26       | 0.01          | 1.00        | 1.00        | 0.02          | 1.00        | 1.00        | 0.02          | 1.00        | 1.00        | 0.02        | 1.00        | 1.00        | 0.01         | 1.00        | 1.00        | 0.02         | 1.00        | 0.99        | 0.04         | 0.82      | 0.46     |
| 28       | 0.01          | 1.00        | 1.00        | 0.02          | 1.00        | 1.00        | 0.02          | 1.00        | 1.00        | 0.02        | 1.00        | 1.00        | 0.01         | 1.00        | 1.00        | <b>0.02</b>  | <b>1.00</b> | <b>1.00</b> | 0.04         | 0.85      | 0.52     |
| 30       | 0.01          | 1.00        | 1.00        | 0.01          | 1.00        | 1.00        | 0.02          | 1.00        | 1.00        | 0.01        | 1.00        | 1.00        | 0.01         | 1.00        | 1.00        | 0.02         | 1.00        | 1.00        | 0.04         | 0.87      | 0.56     |
| 32       | 0.01          | 1.00        | 1.00        | 0.02          | 1.00        | 1.00        | 0.02          | 1.00        | 1.00        | 0.01        | 1.00        | 1.00        | 0.01         | 1.00        | 1.00        | 0.03         | 1.00        | 1.00        | 0.04         | 0.90      | 0.61     |
| 34       | 0.01          | 1.00        | 1.00        | 0.01          | 1.00        | 1.00        | 0.02          | 1.00        | 1.00        | 0.02        | 1.00        | 1.00        | 0.01         | 1.00        | 1.00        | 0.02         | 1.00        | 1.00        | 0.04         | 0.93      | 0.66     |
| 36       | 0.01          | 1.00        | 1.00        | 0.02          | 1.00        | 1.00        | 0.02          | 1.00        | 1.00        | 0.02        | 1.00        | 1.00        | 0.01         | 1.00        | 1.00        | 0.03         | 1.00        | 1.00        | 0.04         | 0.95      | 0.71     |
| 38       | 0.01          | 1.00        | 1.00        | 0.02          | 1.00        | 1.00        | 0.02          | 1.00        | 1.00        | 0.02        | 1.00        | 1.00        | 0.01         | 1.00        | 1.00        | 0.02         | 1.00        | 1.00        | 0.03         | 0.96      | 0.75     |
| 40       | 0.01          | 1.00        | 1.00        | 0.02          | 1.00        | 1.00        | 0.02          | 1.00        | 1.00        | 0.02        | 1.00        | 1.00        | 0.01         | 1.00        | 1.00        | 0.03         | 1.00        | 1.00        | 0.04         | 0.97      | 0.78     |

Table 8. Finite sample size (for Zivot-Andrews test) and finite sample power (for robust test for a break), MA(1) case,  $T = 200$ ,  $\lambda = 0.2$

| $\kappa$ | $\phi = -0.8$ |             |             | $\phi = -0.5$ |             |             | $\phi = -0.2$ |             |             | $\phi = 0$  |             |             | $\phi = 0.2$ |             |             | $\phi = 0.5$ |             |             | $\phi = 0.8$ |             |             |
|----------|---------------|-------------|-------------|---------------|-------------|-------------|---------------|-------------|-------------|-------------|-------------|-------------|--------------|-------------|-------------|--------------|-------------|-------------|--------------|-------------|-------------|
|          | ZA            | $t_{HLT}$   | $t_{PY}$    | ZA            | $t_{HLT}$   | $t_{PY}$    | ZA            | $t_{HLT}$   | $t_{PY}$    | ZA          | $t_{HLT}$   | $t_{PY}$    | ZA           | $t_{HLT}$   | $t_{PY}$    | ZA           | $t_{HLT}$   | $t_{PY}$    | ZA           | $t_{HLT}$   | $t_{PY}$    |
| 0        | 0.19          | 0.15        | 0.73        | 0.07          | 0.07        | 0.23        | 0.06          | 0.10        | 0.10        | 0.04        | 0.12        | 0.06        | 0.02         | 0.13        | 0.08        | 0.03         | 0.13        | 0.09        | 0.01         | 0.13        | 0.11        |
| 2        | 0.11          | 0.26        | 0.87        | 0.06          | 0.15        | 0.28        | 0.05          | 0.15        | 0.14        | 0.04        | 0.16        | 0.10        | 0.02         | 0.16        | 0.11        | 0.03         | 0.15        | 0.11        | 0.01         | 0.14        | 0.12        |
| 4        | 0.10          | 0.74        | 0.98        | 0.04          | 0.51        | 0.55        | 0.04          | 0.37        | 0.29        | 0.04        | 0.31        | 0.24        | 0.02         | 0.27        | 0.21        | 0.02         | 0.23        | 0.17        | 0.01         | 0.20        | 0.16        |
| 6        | <b>0.11</b>   | <b>1.00</b> | <b>1.00</b> | 0.04          | 0.92        | 0.90        | 0.04          | 0.68        | 0.56        | 0.03        | 0.55        | 0.48        | 0.02         | 0.45        | 0.37        | 0.02         | 0.34        | 0.26        | 0.01         | 0.28        | 0.23        |
| 8        | 0.12          | 1.00        | 1.00        | <b>0.04</b>   | <b>1.00</b> | <b>1.00</b> | 0.04          | 0.92        | 0.84        | 0.04        | 0.80        | 0.75        | 0.02         | 0.67        | 0.58        | 0.02         | 0.51        | 0.40        | 0.01         | 0.41        | 0.34        |
| 10       | 0.12          | 1.00        | 1.00        | 0.05          | 1.00        | 1.00        | 0.04          | 0.99        | 0.96        | 0.04        | 0.93        | 0.92        | 0.02         | 0.84        | 0.78        | 0.02         | 0.68        | 0.58        | 0.01         | 0.55        | 0.47        |
| 12       | 0.11          | 1.00        | 1.00        | 0.05          | 1.00        | 1.00        | <b>0.05</b>   | <b>1.00</b> | <b>1.00</b> | 0.05        | 0.99        | 0.98        | 0.02         | 0.94        | 0.91        | 0.02         | 0.82        | 0.72        | 0.01         | 0.68        | 0.59        |
| 14       | 0.11          | 1.00        | 1.00        | 0.04          | 1.00        | 1.00        | 0.05          | 1.00        | 1.00        | <b>0.06</b> | <b>1.00</b> | <b>1.00</b> | 0.02         | 0.98        | 0.97        | 0.01         | 0.92        | 0.84        | 0.01         | 0.80        | 0.71        |
| 16       | 0.12          | 1.00        | 1.00        | 0.04          | 1.00        | 1.00        | 0.05          | 1.00        | 1.00        | 0.06        | 1.00        | 1.00        | 0.02         | 1.00        | 0.99        | 0.02         | 0.97        | 0.93        | 0.01         | 0.89        | 0.82        |
| 18       | 0.11          | 1.00        | 1.00        | 0.04          | 1.00        | 1.00        | 0.04          | 1.00        | 1.00        | 0.05        | 1.00        | 1.00        | <b>0.02</b>  | <b>1.00</b> | <b>1.00</b> | 0.02         | 0.99        | 0.97        | 0.01         | 0.95        | 0.90        |
| 20       | 0.11          | 1.00        | 1.00        | 0.04          | 1.00        | 1.00        | 0.04          | 1.00        | 1.00        | 0.04        | 1.00        | 1.00        | 0.02         | 1.00        | 1.00        | 0.01         | 1.00        | 0.99        | 0.00         | 0.98        | 0.95        |
| 22       | 0.10          | 1.00        | 1.00        | 0.04          | 1.00        | 1.00        | 0.03          | 1.00        | 1.00        | 0.03        | 1.00        | 1.00        | 0.01         | 1.00        | 1.00        | <b>0.01</b>  | <b>1.00</b> | <b>1.00</b> | 0.00         | 0.99        | 0.97        |
| 24       | 0.10          | 1.00        | 1.00        | 0.04          | 1.00        | 1.00        | 0.03          | 1.00        | 1.00        | 0.02        | 1.00        | 1.00        | 0.01         | 1.00        | 1.00        | 0.01         | 1.00        | 1.00        | 0.01         | 1.00        | 0.99        |
| 26       | 0.10          | 1.00        | 1.00        | 0.04          | 1.00        | 1.00        | 0.03          | 1.00        | 1.00        | 0.02        | 1.00        | 1.00        | 0.01         | 1.00        | 1.00        | 0.01         | 1.00        | 1.00        | <b>0.00</b>  | <b>1.00</b> | <b>1.00</b> |
| 28       | 0.10          | 1.00        | 1.00        | 0.04          | 1.00        | 1.00        | 0.03          | 1.00        | 1.00        | 0.02        | 1.00        | 1.00        | 0.01         | 1.00        | 1.00        | 0.01         | 1.00        | 1.00        | 0.01         | 1.00        | 1.00        |
| 30       | 0.10          | 1.00        | 1.00        | 0.04          | 1.00        | 1.00        | 0.03          | 1.00        | 1.00        | 0.01        | 1.00        | 1.00        | 0.01         | 1.00        | 1.00        | 0.01         | 1.00        | 1.00        | 0.01         | 1.00        | 1.00        |
| 32       | 0.10          | 1.00        | 1.00        | 0.04          | 1.00        | 1.00        | 0.03          | 1.00        | 1.00        | 0.01        | 1.00        | 1.00        | 0.01         | 1.00        | 1.00        | 0.02         | 1.00        | 1.00        | 0.01         | 1.00        | 1.00        |
| 34       | 0.09          | 1.00        | 1.00        | 0.04          | 1.00        | 1.00        | 0.03          | 1.00        | 1.00        | 0.02        | 1.00        | 1.00        | 0.01         | 1.00        | 1.00        | 0.01         | 1.00        | 1.00        | 0.01         | 1.00        | 1.00        |
| 36       | 0.10          | 1.00        | 1.00        | 0.04          | 1.00        | 1.00        | 0.03          | 1.00        | 1.00        | 0.02        | 1.00        | 1.00        | 0.01         | 1.00        | 1.00        | 0.01         | 1.00        | 1.00        | 0.01         | 1.00        | 1.00        |
| 38       | 0.09          | 1.00        | 1.00        | 0.04          | 1.00        | 1.00        | 0.03          | 1.00        | 1.00        | 0.02        | 1.00        | 1.00        | 0.01         | 1.00        | 1.00        | 0.01         | 1.00        | 1.00        | 0.01         | 1.00        | 1.00        |
| 40       | 0.09          | 1.00        | 1.00        | 0.04          | 1.00        | 1.00        | 0.03          | 1.00        | 1.00        | 0.02        | 1.00        | 1.00        | 0.01         | 1.00        | 1.00        | 0.01         | 1.00        | 1.00        | 0.01         | 1.00        | 1.00        |

### 3 Further extensions

Based on the properties of our proposed modifications described in the previous section, these procedures can be expanded in several directions. Furthermore, we briefly consider the following generalizations indicating the associated limitations: the presence of more than one structural break, and the presence of *a priori* information about the location of the break.

#### 3.1 Multiple structural breaks

The test procedures discussed above can be used in a case of multiple structural breaks, because if the number of breaks is more than taken into account when constructing the test, the power will drop to zero. For the unit root tests we can consider two types of tests based on OLS- or GLS-detrending, respectively, similar to the previous section. The infimum test based on GLS-detrending was proposed by HLT2013 in the context of a case of multiple breaks, and this test was effective under small initial conditions. The extensions of the OLS-based tests are constructed in a similar way.

However, the problem of the construction of the effective combination of OLS-based tests under large initial conditions has arisen. The behavior of the *MDF-OLS* with multiple breaks is not investigated under fixed break magnitudes and unclear how large the magnitudes of breaks should be in order experience serious size distortions with *MDF-OLS*. If we find an effective combination of OLS-based tests, it could be used in similar strategies to those described in Section 4, with the Kejriwal and Perron (2010) and Sobreira and Nunes (2012) procedures used as pre-tests to determine the number of breaks (see also Sobreira *et al.* (2014)). However, the power “valleys” for these strategies can be much more severe and can increase with the number of tests. One might ask whether it makes sense in the case of, for example, three breaks, to use a fairly complex combination of tests, and the best solution is to use only one test (with the maximum number of breaks). We have left all these questions open for future research. Currently, the test based on (augmented) Dickey-Fuller regression with break dates estimators according Harvey and Leybourne (2013) (the  $ADF-OLS^{tb}(\hat{\lambda}^{D_m})$  in case of multiple breaks) seems to be the most robust.

#### 3.2 *A priori* information on the break date

One modification when testing with the allowance for one structural break was proposed in Harvey *et al.* (2014). Many unit root tests with a break use the fact that the break can occur in any location, except for some values at the beginning and end of the series. However, the researcher may know some *a priori* information about the location of the break without knowing its exact location. This approach was first considered by Andrews (1993) when testing for general structural instability by motivating it using two examples: a significant political event (economic reform, war, etc.) can occur in a certain period of time, but it is unknown exactly when the effects begin; the event may occur on a certain date, but the effect occurs with some delay.

*A priori* information about the date of the break implies that the true break fraction is  $\lambda_0 \in \Lambda(\tau_{mid}, \delta)$ , where  $\Lambda(\tau_{mid}, \delta)$  is a window in which the break occurs. This window is defined as  $\Lambda(\tau_{mid}, \delta) = [\tau_{mid} - \delta/2, \tau_{mid} + \delta/2]$ , where  $\delta > 0$  denotes the width of the window containing all permissible break fractions, and  $\tau_{mid}$  denotes the mid-point of the window.  $\tau_{mid} - \delta/2 > 0$  and  $\tau_{mid} + \delta/2 < 1$  is a requirement.

Therefore, all minimizations considered in this paper are performed not on the whole set  $\Lambda = [\lambda_L, \lambda_U]$ , but on the set  $\Lambda(\tau_{mid}, \delta)$ . It is clear that the power of the test increases when there is more known *a priori* information about the location of the true break date, i.e. with a decreasing value of  $\delta$ . The location of the break within the selected window has a small effect on the asymptotic size and power. However, the size and power will be seriously downward biased if the information about the true break date location is wrong, and the distortion increases as the error of this information increases. Thus, all procedures considered in this paper can be easily expanded to cases of partial information about the break date location.<sup>1</sup> The ox-code for calculating the critical values and scaling constants for different  $\delta$  and  $\tau_{mid}$  is available on the author's web-page.

---

<sup>1</sup>Note, that the *MDF-OLS* test can be used for all  $\kappa$  if the break is occurred in the second half of sample.

## References

- Andrews, D.W.K. (1993). Tests for Parameter Instability and Structural Change with Unknown Change Point. *Econometrica*, **61**, 821–856.
- Harris, D., Harvey, D.I., Leybourne, S.J., and Taylor, A.M.R. (2009). Testing for a Unit Root in the Presence of a Possible Break in Trend. *Econometric Theory*, **25**, 1545–1588.
- Harvey, D.I. and Leybourne, S.J. (2013). Break Date Estimation for Models with Deterministic Structural Change. *Oxford Bulletin of Economics and Statistics*, **76**, 623–642.
- Harvey, D.I., Leybourne, S.J., and Taylor, A.M.R. (2009). Simple, Robust and Powerful Tests of the Breaking Trend Hypothesis. *Econometric Theory*, **25**, 995–1029.
- Harvey, D.I., Leybourne, S.J., and Taylor, A.M.R. (2014). Unit Root Testing under a Local Break in Trend using Partial Information on the Break Date. *Oxford Bulletin of Economics and Statistics*, **76**, 93–111.
- Kejriwal, M. and Perron, P. (2010). A Sequential Procedure to Determine the Number of Breaks in Trend with an Integrated or Stationary Noise Component. *Journal of Time Series Analysis*, **31**, 305–328.
- Perron, P. and Yabu, T. (2009). Testing for Shifts in Trend with an Integrated or Stationary Noise Component. *Journal of Business and Economic Statistics*, **27**, 369–396.
- Sobreira, N. and Nunes, L.C. (2012). Tests for Multiple Breaks in the Trend with Stationary or Integrated Shocks. Unpublished Manuscript.
- Sobreira, N., Nunes, L.C., and Rodrigues, P.M.M. (2014). Characterizing economic growth paths based on new structural change tests. *Economic Inquiry*, **52**, 845–861.
